# Supplementary material
Source: PubMed Central journal article supplement (PMC3724415)
Supplement: NIHMS478356-supplement-1_si_001.pdf [file NIHMS478356-supplement-1_si_001.pdf]

---

## Supporting Information for

### Real-time detection of isothermal amplification reactions with thermostable catalytic hairpin assembly

Yu (Sherry) Jiang, Bingling Li, John N. Milligan, Sanchita Bhadra, and Andrew D. Ellington

Institute for Cellular and Molecular Biology, University of Texas at Austin, Austin, Texas, US

Center for Systems and Synthetic Biology, University of Texas at Austin, Austin, Texas, US

Department of Chemistry and Biochemistry, University of Texas at Austin, Austin, Texas, US

#### 1. Materials and Methods

**Chemicals, oligonucleotides and oligonucleotide complexes.** All chemicals were of analytical grade and were purchased from Sigma-Aldrich (MO, USA) unless otherwise indicated. All oligonucleotides were ordered from Integrated DNA Technology (IDT, Coralville, IA, USA). Oligonucleotide sequences are summarized in **Table S1**. All oligonucleotides were stored in 10  $\mu$ M stocks in H<sub>2</sub>O or 1 $\times$ TE (pH 7.5) at -20 °C. Enzymes used here were Phi29 polymerase, Bst large fragment polymerase, Klenow fragment (3'-5'exo) polymerase, Nb.BbvCI nicking enzyme, Nb.BsrDI nicking enzyme, T4 ligase, ExoI exonuclease, and ExoIII exonuclease. Reaction mixtures used here were:

- 1 $\times$ TNaK (20 mM Tris-HCl, 140 mM NaCl, 5 mM KCl, pH 7.5)
- 1 $\times$ ThermoPol (20 mM Tris-HCl, 10 mM (NH<sub>4</sub>)<sub>2</sub>SO<sub>4</sub>, 10 mM KCl, 2 mM MgSO<sub>4</sub>, 0.1% Triton X-100, pH8.8)
- 1 $\times$ Phi29 (50 mM Tris-HCl, 10 mM MgCl<sub>2</sub>, 10 mM (NH<sub>4</sub>)<sub>2</sub>SO<sub>4</sub>, 4 mM Dithiothreitol, pH 7.5)
- 1 $\times$ NEBuffer 2 (50 mM NaCl, 10 mM Tris-HCl, 10 mM MgCl<sub>2</sub>, 1 mM Dithiothreitol, pH 7.9)
- 10 $\times$ NEBuffer 1 (10 mM Bis-Tris-Propane-HCl, 10 mM MgCl<sub>2</sub>, 1 mM Dithiothreitol, pH 7.0)
- 1 $\times$ T4 ligation (30 mM Tris-HCl, 10 mM MgCl<sub>2</sub>, 10 mM DTT, 1 mM ATP, pH 7.8)

Except for 1 $\times$ TNaK, all the enzymes and reaction mixtures were purchased from New England BioLabs Inc., MA, USA.

**Real-time CHA fluorescence kinetic reading.** All the hairpins and reporters were annealed at 90 °C for 5 min and cooled down to 25 °C at a rate of 0.1 °C/s before use. CHA's kinetic reading was performed in 1 $\times$ TNaK reaction conditions with a final concentration of 50 nM H1, 200 nM H2, and 50 nM reporter. The fluorescence signals were recorded every 2 min at different temperatures using the 7300 Real-Time PCR System with MicroAmp® Optical 96-Well Reaction Plates.

**Ligation of Circular DNA.** The targets of both high temperature RCA and low temperature RCA were ligated with T4 ligation enzymes as per the following protocol. Five tubes were prepared with 'Solution A', each tube containing 1  $\mu$ M template, 1  $\mu$ M splint, and 1 $\times$ ligation buffer for a total of 10  $\mu$ L per tube. These samples were incubated for 2 min at 95 °C and cooled down to 25 °C at a rate of 0.1 °C/s. During the incubation, a mastermix of 'Solution B' was made containing 40 U/ $\mu$ L T4 ligation enzyme and 1 $\times$ ligation buffer to total 50  $\mu$ L. After this first incubation finished, 10  $\mu$ L Solution B was added to each Solution A sample for a total of

---

20  $\mu\text{L}$  per tube. These A-B solutions were incubated for 6 min at 25  $^{\circ}\text{C}$ . After incubation, the samples were combined into one mixture, purified with a G25 column, and eluted with 50  $\mu\text{L}$  DI water. To further purify the 50  $\mu\text{L}$  sample, we added 2  $\mu\text{L}$  ExoI (40 U/ $\mu\text{L}$ ), 1  $\mu\text{L}$  ExoIII (100 U/ $\mu\text{L}$ ), 5  $\mu\text{L}$  10 $\times$ NEBuffer 1, and 37  $\mu\text{L}$  DI water for a total 100  $\mu\text{L}$  reaction system. We incubated this at 37  $^{\circ}\text{C}$  overnight before purifying the product with a PAGE gel and confirming the concentration of the circular DNA targets with a nanodrop.

**Real-time reading of RCA-CHA system.** High temperature real-time RCA detection was carried out in a 20  $\mu\text{L}$  system consisting of the varying concentrations of circular DNA chosen for this experiment, 100 nM primer, 200  $\mu\text{M}$  dNTPs, 0.4 U/ $\mu\text{L}$  Bst, 66 nM H1, 266 nM H2, and 66 nM reporter in the 1 $\times$ ThermoPol reaction conditions. The fluorescence signals were recorded every 3 min at 60  $^{\circ}\text{C}$  using the 7300 Real-Time PCR System with MicroAmp<sup>®</sup> Optical 96-Well Reaction Plates. Low temperature real-time RCA was carried out in a 20  $\mu\text{L}$  system consisting of the varying concentrations of circular DNA chosen for this experiment, 100 nM primer, 200  $\mu\text{M}$  dNTPs, 0.2  $\mu\text{g}/\mu\text{L}$  BSA, 0.5 U/ $\mu\text{L}$  Phi29, 50 nM H1, 200 nM H2, 50 nM reporter, and 1  $\mu\text{M}$  InvtdT (inverted modified oligo dT, see Table S3) in the 1 $\times$ Phi29 reaction conditions. The fluorescence signals were recorded every 1.5 min at 37  $^{\circ}\text{C}$  using the Tecan Safire plate reader with NUNC 384-well Reaction Plates.

**Real-time reading of SDA-CHA system.** High temperature real-time SDA detection was carried out in the 1 $\times$ NEBuffer 2 reaction conditions with the varying concentrations of circular DNA chosen for this experiment, 100 nM primer, 200  $\mu\text{M}$  dNTPs, 0.5 U/ $\mu\text{L}$  Nb.BsrDI, 0.4 U/ $\mu\text{L}$  Bst, 66 nM H1, 266 nM H2, 66 nM reporter, and 1  $\mu\text{M}$  InvtdT. The fluorescence signals for high temperature were recorded every 3 min at 60  $^{\circ}\text{C}$  using the 7300 Real-Time PCR System with MicroAmp<sup>®</sup> Optical 96-Well Reaction Plates. Low temperature real-time SDA was carried out in 1 $\times$ NEBuffer 2, 0.5 U/ $\mu\text{L}$  Nb.BbvCI, 0.25 U/ $\mu\text{L}$  Klenow fragment (3'-5'exo), 200  $\mu\text{M}$  dNTPs, 100 nM primer, 50 nM H1, 200 nM H2, 50 nM reporter, and 1  $\mu\text{M}$  InvtdT. The fluorescence signals were recorded every 1.5 min at 37  $^{\circ}\text{C}$  using the Tecan Safire plate reader with NUNC 384-well Reaction Plates.

**Electrophoresis analysis of RCA reaction by agarose gel.** A 20  $\mu\text{L}$  system with the varying concentrations of circular DNA chosen for this experiment, 100 nM primer, 0.4 U/ $\mu\text{L}$  Bst, and 1  $\mu\text{M}$  InvtdT in the 1 $\times$ ThermoPol reaction conditions was incubated at 60  $^{\circ}\text{C}$  for 3 h followed by 15 min of incubation at 80  $^{\circ}\text{C}$ . After this reaction the sample was kept at 4  $^{\circ}\text{C}$  until electrophoresis. Each electrophoresis experiment was carried out with a 1% SeaKem<sup>®</sup> LE agarose gel. Each well had 10  $\mu\text{L}$  of sample and an additional 2  $\mu\text{L}$  6 $\times$ Orange loading dye for a total 12  $\mu\text{L}$  system.

## 2. Supporting Figures and Tables

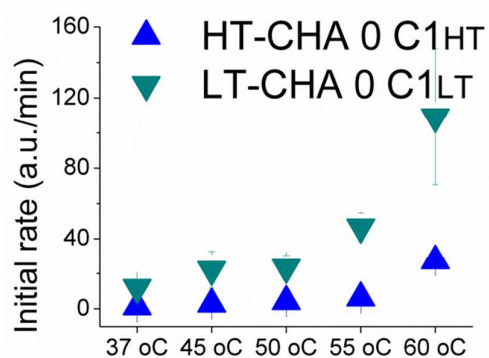

**Figure S1:** Initial rates of LT-CHA and HT-CHA without catalyst in the lower range of rates.

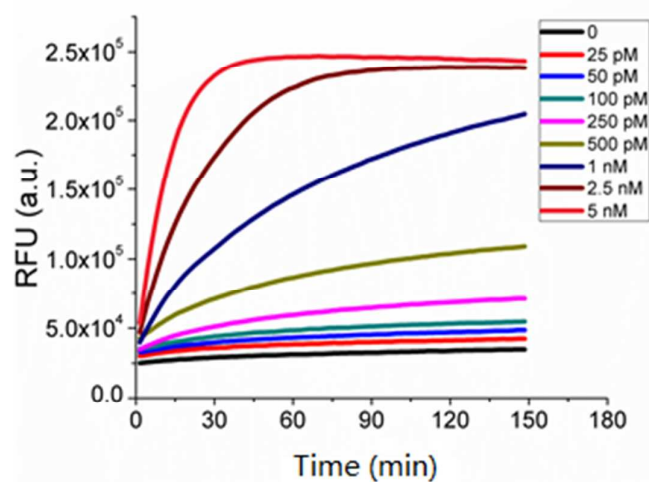

**Figure S2:** Concentration dependence of  $C_{HT}$  with HT-CHA at 60 °C in TNaK reaction. The kinetic traces of different combinations of circuit components are shown in different colors.

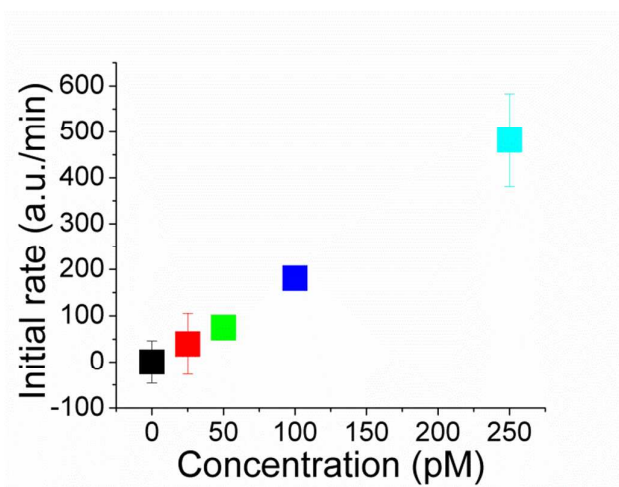

**Figure S3:** Initial rate vs. the lower range of  $C_{HT}$  concentrations for HT-CHA at 60 °C.

|                         | LT-CHA (37 °C)                                      | HT-CHA (60 °C) |
|-------------------------|-----------------------------------------------------|----------------|
| <b>Each toehold</b>     | 8 bases                                             | 9 bases        |
| <b>H1 Stem</b>          | 16 bases                                            | 19 bases       |
| <b>H1 Loop</b>          | 11 bases                                            | 14 bases       |
| <b>H2 Stem</b>          | 11 bases                                            | 14 bases       |
| <b>H2 Loop</b>          | 16 bases                                            | 19 bases       |
| <b>Reporter duplex</b>  | 19 bases                                            | 22 bases       |
| <b>Reaction mixture</b> | TNaK: 20 mM Tris-HCl, 140 mM NaCl, 5 mM KCl, pH 7.5 |                |

Table S1: Design of the LT-CHA and HT-CHA.

|               | Components      | 37 °C  | 45 °C  | 50 °C  | 55 °C  | 60 °C  | 65 °C  |
|---------------|-----------------|--------|--------|--------|--------|--------|--------|
| <b>LT-CHA</b> | <b>H1</b>       | -14.09 | -11.05 | -9.14  | -7.24  | -5.34  | -3.44  |
|               | <b>H2</b>       | -6.95  | -5.04  | -3.84  | -2.64  | -1.45  | -0.25  |
|               | <b>Reporter</b> | -23.22 | -19.77 | -17.61 | -15.46 | -13.3  | -11.15 |
| <b>HT-CHA</b> | <b>H1</b>       | -21.41 | -17.21 | -14.59 | -11.96 | -9.49  | -7.16  |
|               | <b>H2</b>       | -13.9  | -10.34 | -8.17  | -6.53  | -4.9   | -3.26  |
|               | <b>Reporter</b> | -27.5  | -23.62 | -21.19 | -18.76 | -16.33 | -13.9  |

**ΔG is calculated with NuPACK using 150 mM NaCl. Temperatures varied.**

**Table S2: Comparison of the ΔG value of LT-CHA and HT-CHA components at different temperatures.**  
 ΔG of LT-CHA at 50 °C was chosen as the standard because studies have shown it to be the highest temperature at which LT-CHA functions.

| Name          | Sequence (5'-3')                                                                                                          | Notes                                                                      |
|---------------|---------------------------------------------------------------------------------------------------------------------------|----------------------------------------------------------------------------|
| <b>LT-CHA</b> | <b>H1<sub>LT</sub></b><br>GTCAGTGA GCTAGGTT AGATGTCG CCATGTGTAGA CGACATCT AACCTAGC CCTTGTC A TAGAGCAC/3InvdT/             | Only oligos in the real-time reading system will be modified with /3InvdT/ |
|               | <b>H2<sub>LT</sub></b><br>AGATGTCG TCTACACA TGCGGACA TCTAAC CTAGCCCATGTG TAG A/3InvdT/                                    |                                                                            |
|               | <b>F<sub>LT</sub></b><br>/56-FAM/CGA GTGCTCTA TGACAAGG GCTAGGTT/3InvdT/                                                   |                                                                            |
|               | <b>Q<sub>LT</sub></b><br>C CCTTGTC A TAGAGCAC TCG/3IABkFQ/                                                                |                                                                            |
|               | <b>C1<sub>LT</sub></b><br>CGACATCT AACCTAGC TCACTGAC/3InvdT/                                                              |                                                                            |
| <b>HT-CHA</b> | <b>H1<sub>HT</sub></b><br>GTCACGTGA GCTAGCGTT AGCATCGTCG CCATGCTGCTAGCA CGACGATGCT AACGCTAGC CCTTGTC A TACGCAGCAC/3InvdT/ | Only oligos in the real-time reading system will be modified with /3InvdT/ |
|               | <b>H2<sub>HT</sub></b><br>AGCATCGTCG TGCTAGCAGCATGG CGACGATGCT AACGCTAGC CCATGCTGCTAGCA/3InvdT/                           |                                                                            |
|               | <b>F<sub>HT</sub></b><br>/56-FAM/CGA GTGCTGCGTA TGACAAGG GCTAGCGTT/3InvdT/                                                |                                                                            |

|                |                            |                                                                                                                              |                                                                                                           |
|----------------|----------------------------|------------------------------------------------------------------------------------------------------------------------------|-----------------------------------------------------------------------------------------------------------|
|                | <b>Q<sub>HT</sub></b>      | C CCTTGTC A TACGCAGCAC TCG /3IABkFQ/                                                                                         |                                                                                                           |
|                | <b>C1<sub>HT</sub></b>     | CGACGATGCT AACGCTAGC TCACGTGAC                                                                                               |                                                                                                           |
|                | <b>H1<sub>EHT</sub></b>    | CGTCACGTGA GCTAGCGTT AGCATCGTCG CCATGCTGCTAGCA<br>CGACGATGCT AACGCTAGC CCTTGTC A<br>TACGCAGCAC/3InvdT/                       |                                                                                                           |
| <b>InvT-dT</b> |                            | TTTTTTTTTTTTTTTTTTTT/3InvdT/                                                                                                 |                                                                                                           |
| <b>HT-RCA</b>  | <b>T<sub>HTRCA</sub></b>   | /5Phos/CTTCCTGT ATTCA CTTGG AGG TAC GTC ACG TGA<br>GCT AGC GTT AGC ATC GTC G AAG TTG AGT<br>CTGTACGTAAGGTTCT                 | Circular<br>T <sub>HTRCA</sub> is<br>generated by<br>ligating 5'end<br>and 3'end of<br>T <sub>HTRCA</sub> |
|                | <b>Splint<sub>HT</sub></b> | CCAAG TGAAT ACAGGAAGAGAACCCTTACGTACAG ACT CAA                                                                                |                                                                                                           |
|                | <b>P<sub>HTRCA</sub></b>   | CCAAG TGAAT ACAGGAAGAGAACC                                                                                                   |                                                                                                           |
| <b>LT-RCA</b>  | <b>T<sub>LTRCA</sub></b>   | /5Phos/TGG CTC AGC TGG CTG GTG CCGGTTCTCTTCCTGT<br>ATTCA CTTGG GTC AGT GAG CTA GGT TAG ATG TCG GGT<br>TGT TCT GGT CCA TGA AT | Circular<br>T <sub>LTRCA</sub> is<br>generated by<br>ligating 5'end<br>and 3'end of<br>T <sub>LTRCA</sub> |
|                | <b>Splint<sub>LT</sub></b> | GGCACCAGCCAGCTGAGCCAATTCATGGACCAGAACAACC                                                                                     |                                                                                                           |
|                | <b>P<sub>LTRCA</sub></b>   | CCAAG TGAAT ACAGGAAGAGAACC                                                                                                   |                                                                                                           |
| <b>HT-SDA</b>  | <b>T<sub>HTSDA</sub></b>   | TACGTCACGTGAGCTAGCGTTAGCATCGTCG AA GCAATG AAA<br>GCCGATACAGGATCCAACAG                                                        |                                                                                                           |
|                | <b>P<sub>HTSDA</sub></b>   | CTG TTG GAT CCT GTA TCG GC                                                                                                   |                                                                                                           |
| <b>LT-SDA</b>  | <b>T<sub>LTSDA</sub></b>   | GTCAGTGAGCTAGGTTAGATGTCG ATAT CCTCAGC AAA<br>GCCGATACACCAATCCAACAG                                                           |                                                                                                           |
|                | <b>P<sub>LTSDA</sub></b>   | CTGTTGGATTGGTGTATCGGC                                                                                                        |                                                                                                           |

Table S3: Oligonucleotides used in this paper.

| Real-time system                                                | Isothermal components                                                                                                                 |                                            | CHA components                                 |                                                                                 | Reaction mixtures |
|-----------------------------------------------------------------|---------------------------------------------------------------------------------------------------------------------------------------|--------------------------------------------|------------------------------------------------|---------------------------------------------------------------------------------|-------------------|
| <b>LT-CHA</b><br>(Figure 2A)<br>(Figure 2C)                     | None                                                                                                                                  |                                            | [H1 <sub>LT</sub> ]=50 nM                      | TNaK*                                                                           |                   |
|                                                                 |                                                                                                                                       |                                            | [H2 <sub>LT</sub> ]=200 nM                     |                                                                                 |                   |
|                                                                 |                                                                                                                                       |                                            | [F <sub>LT</sub> ]=1/2[Q <sub>LT</sub> ]=50 nM |                                                                                 |                   |
| <b>HT-CHA</b><br>(Figure 2B)<br>(Figure 2C)<br>(Figure 2D)      | None                                                                                                                                  |                                            | [H1 <sub>LT</sub> ]=50 nM                      | TNaK*                                                                           |                   |
|                                                                 |                                                                                                                                       |                                            | [H2 <sub>LT</sub> ]=200 nM                     |                                                                                 |                   |
|                                                                 |                                                                                                                                       |                                            | [F <sub>LT</sub> ]=1/2[Q <sub>LT</sub> ]=50 nM |                                                                                 |                   |
| <b>60°C HT-RCA</b><br>(Figure 3B)<br>(Figure 4B)<br>(Figure 4D) | Target                                                                                                                                | Circular T <sub>HTRCA</sub>                | EHT-CHA                                        | [H1 <sub>EHT</sub> ]=66 nM (Figure 4B)<br>[H1 <sub>HT</sub> ]=66 nM (Figure 4D) | ThermoPol*        |
|                                                                 | Primer                                                                                                                                | [P <sub>HTRCA</sub> ]=100 nM               |                                                | [H2 <sub>HT</sub> ]=264 nM                                                      |                   |
|                                                                 | Enzyme                                                                                                                                | Bst large fragment                         |                                                | [F <sub>HT</sub> ]=1/5[Q <sub>HT</sub> ]=66 nM                                  |                   |
| <b>37°C LT-RCA</b><br>(Figure 3C)                               | Target                                                                                                                                | Circular T <sub>LTRCA</sub>                | LT-CHA                                         | [H1 <sub>LT</sub> ]=50 nM                                                       | Phi29*            |
|                                                                 | Primer                                                                                                                                | [P <sub>LTRCA</sub> ]=100 nM               |                                                | [H2 <sub>LT</sub> ]=200 nM                                                      |                   |
|                                                                 | Enzyme                                                                                                                                | Phi29 polymerase                           |                                                | [F <sub>LT</sub> ]=1/2[Q <sub>LT</sub> ]=50 nM                                  |                   |
| <b>60°C HT-SDA</b><br>(Figure 5B)                               | Target                                                                                                                                | T <sub>HTSDA</sub>                         | EHT-CHA                                        | [H1 <sub>EHT</sub> ]=66 nM                                                      | NEBuffer2*        |
|                                                                 | Primer                                                                                                                                | [P <sub>HTSDA</sub> ]=100 nM               |                                                | [H2 <sub>HT</sub> ]=264 nM                                                      |                   |
|                                                                 | Enzyme                                                                                                                                | Bst large fragment,<br>Nb. BsrDI           |                                                | [F <sub>HT</sub> ]=1/5[Q <sub>HT</sub> ]=66 nM                                  |                   |
| <b>37°C LT-SDA</b><br>(Figure 5C)                               | Target                                                                                                                                | T <sub>LTSDA</sub>                         | LT-CHA                                         | [H1 <sub>LT</sub> ]=50 nM                                                       | NEBuffer2*        |
|                                                                 | Primer                                                                                                                                | [P <sub>LTSDA</sub> ]=100 nM               |                                                | [H2 <sub>LT</sub> ]=200 nM                                                      |                   |
|                                                                 | Enzyme                                                                                                                                | Klenow (3'-5'exo-) polymerase,<br>Nb.BbvCI |                                                | [F <sub>LT</sub> ]=1/2[Q <sub>LT</sub> ]=50 nM                                  |                   |
| *TNaK                                                           | 20 mM Tris-HCl, 140 mM NaCl, 5 mM KCl, pH 7.5                                                                                         |                                            |                                                |                                                                                 |                   |
| *ThermoPol                                                      | 20 mM Tris-HCl, 10 mM (NH <sub>4</sub> ) <sub>2</sub> SO <sub>4</sub> , 10 mM KCl, 2 mM MgSO <sub>4</sub> , 0.1% Triton X-100, pH 8.8 |                                            |                                                |                                                                                 |                   |
| *Phi29                                                          | 50 mM Tris-HCl, 10 mM MgCl <sub>2</sub> , 10 mM (NH <sub>4</sub> ) <sub>2</sub> SO <sub>4</sub> , 4 mM Dithiothreitol, pH 7.5         |                                            |                                                |                                                                                 |                   |
| *NEBuffer 2                                                     | 10 mM Tris-HCl, 50 mM NaCl, 10 mM MgCl <sub>2</sub> , 1 mM Dithiothreitol, pH 7.9                                                     |                                            |                                                |                                                                                 |                   |

**Table S4:** Components used in Figure 2 to Figure 5.

### 3. Design principle of the CHA circuit and HT-CHA circuit.

a. Our CHA circuit workflow is shown below.

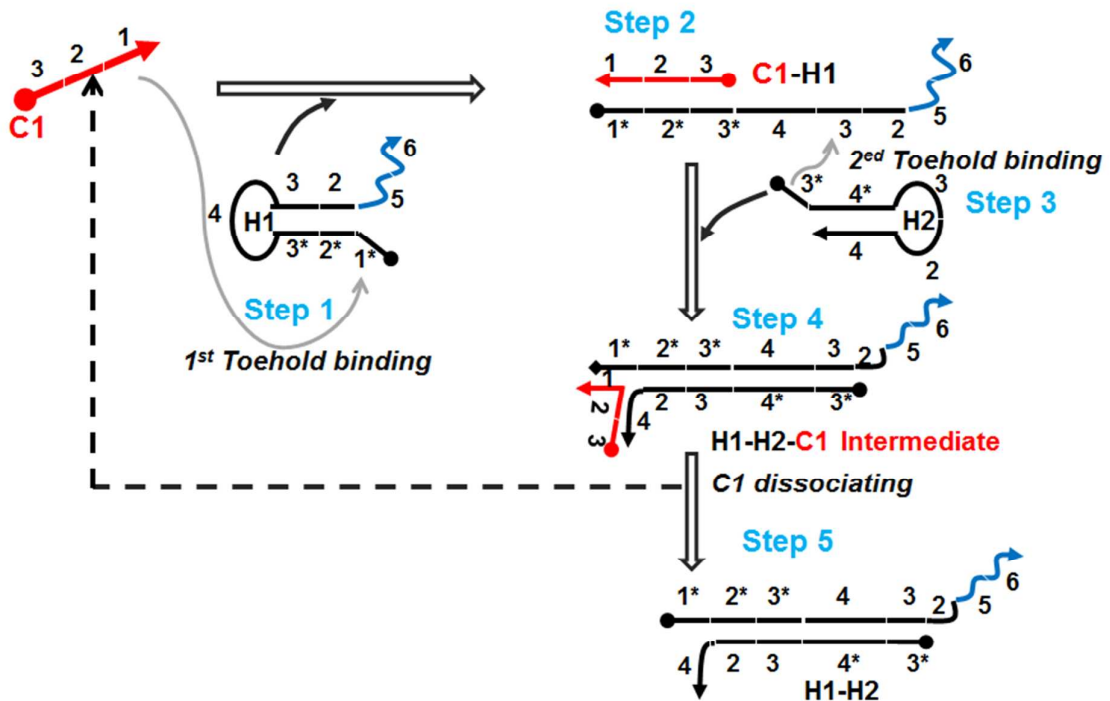

As seen in the workflow above, we designed a LT-CHA circuit to work at 37 °C, listed in Table S1.

| LT-CHA (37°C)   |                                               |
|-----------------|-----------------------------------------------|
| Each toehold    | 8 bases                                       |
| H1 Stem         | 16 bases                                      |
| H1 Loop         | 11 bases                                      |
| H2 Stem         | 11 bases                                      |
| H2 Loop         | 16 bases                                      |
| Reporter duplex | 19 bases                                      |
| Buffer          | 20 mM Tris-HCl, 140 mM NaCl, 5 mM KCl, pH 7.5 |

These steps in the LT-CHA circuit correspond to the numbered steps in the workflow above.

### b. Four general rules for the design of CHA circuits.

**Rule I:** Make the  $\Delta G$  as negative as possible, to assure there is low background leakage.

- The lengths of a duplex or hairpin stem determine the overall stability ( $\Delta G$ ) of the CHA circuit. Under the defined “G+C” ratio, the longer the duplex or hairpin stem is, the more negative the  $\Delta G$  might be.

---

As  $\Delta G$  negativity increases, the background leakage decreases.

**Rule II: Determine the optimum toehold length for the overall catalytic reaction rate.**

- To simplify the design process, we made all the toeholds the same length. However, determining this single, optimum length required us to balance several factors.
- The catalytic reaction rate as a whole is comprised of the toehold based strand displacement rate (STEPS 1 and 3 of the CHA reaction above) and the catalyst dissociation rate (STEP 5 of the CHA reaction above).
- The strand displacement rate favors the longest toehold possible. The catalyst dissociation rate favors the shortest toehold possible. The optimum length for the entire reaction rate, therefore, lies somewhere in between the two.

**Rule III: Minimize the potential for aberrant folding and unintended secondary structures.**

- When hairpins misfold or ssDNA form unexpected structures, the catalytic reaction is almost always impaired.
- Software programs like NuPACK, mFOLD, or Circuit Design will help you to carefully consider the appropriate reaction conditions and temperature. This should help to minimize aberrations.

**Rule IV: Provided that the requirements for Rule 1 and 2 have been satisfied, minimize the length of the strands.**

- This will save you money on materials.
- More importantly, longer lengths of DNA increase the risk for errors or impurities during chemical synthesis. Any impurities in the two hairpins will negatively affect the background leakage rate.
- Thus the minimum length of DNA that stills satisfied Rules 1 and 2 is ideal.

### c. Our Design of a HT-CHA

**1) Design a LT-CHA according to the previously described rules. Test this standard 37 °C LT-CHA at different temperatures including, 37 °C, 45 °C, 50 °C, 55 °C, and 60 °C.**

The results are seen in **Figure 2C**: The catalytic reaction rate consistently decreases with increasing temperature, with a near 10-fold decrease by 60 °C. However, the background leakage rate remains almost unchanged at 45 °C and 50 °C. It only begins to show any significant increase at temperatures over 50 °C. By 60 °C again, the leakage rate increases almost 10-fold. So by 60 °C, we lost almost 100-fold performance.

**2) Design a HT-CHA (Table S1 and Table S2), also in accordance with the previously described rules.**

After the previous test of the LT-CHA standard, it was hypothesized that to make a 60 °C CHA as effective as one at 37 °C, the toehold length would have to be increased in order to maintain the catalytic rate (**Rule I**) while the hairpin stem would have to be extended in order to decrease background leakage (**Rule II**).

According to a previous study [1], it was suggested that one additional toehold could increase the reaction rate by as much as 10-fold. So the toehold domains were increased from 8 bases to 9 bases (**Rule III**). In addition, adding 3 more base pairs on each hairpin stem could make the  $\Delta G$  value similar to that of a LT-CHA hairpin at 50 °C (which was chosen as the standard temperature to maintain low background



---

leakage). Therefore the hairpin stems were changed from 16 bp to 19 bp (**Rule III**). These were the minimum stem and toehold length increases possible while still meeting **Rule I and II** requirements (**Rule IV**). So our HT-CHA started with a 9-base toehold and a 19-bp stem, which as it turns out functions as well in TNaK reaction conditions as did the original LT-CHA.

Ref. [1] Zhang, D. Y.; Winfree, E. J. *Am. Chem. Soc.* 2009, 131, 17303.
